# Supplementary material for: Neem Leaf Extract Exhibits Anti-Aging and Antioxidant Effects from Yeast to Human Cells
Source: MDPI journal article supplement (doi:10.3390/nu16101506), 2024-05-16
Supplement: s1 [file s1]

**Table S1.** The potential active compounds of neem leaf extract. (“N/A” means “Not applicable”).

| N<br>o. | Compound                                                                                                                                                                                                                | Molecular<br>Formula | Adduct | Referen<br>ce m/z | m/z     | Retenti<br>on time<br>(s) | Superclass | MQScore  | Numb<br>er of<br>targets<br>(yeast) | Numb<br>er of<br>targets<br>(huma<br>n) | InChIKey                        |
|---------|-------------------------------------------------------------------------------------------------------------------------------------------------------------------------------------------------------------------------|----------------------|--------|-------------------|---------|---------------------------|------------|----------|-------------------------------------|-----------------------------------------|---------------------------------|
| 1       | 3-{6-[[[(6S,2R,3R,4R,5R)-3,4,5-trihydroxy-6-methyl(2H-3,4,5,6-tetrahydropyran-2-yloxy))methyl](2S,4S,5S,3R,6R)-3,4,5-trihydroxy(2H-3,4,5,6-tetrahydropyran-2-yloxy)]-2-(2,3-dihydroxyphenyl)-5,7-dihydroxychromen-4-one | C27H30O16            | M-H    | 609.146           | 609.139 | 239.99                    | Flavonoids | 0.977483 | 0                                   | 9                                       | ZMDOPLQSOGZPJ<br>N-UHFFFAOYSA-N |
| 2       | Nicotiflorin                                                                                                                                                                                                            | C27H30O15            | M-H    | 593.151           | 593.144 | 251.551                   | Flavonoids | 0.97537  | 0                                   | 12                                      | RTATXGUCZHCSN<br>G-QHWHWDPRSA-N |
| 3       | Quercetin                                                                                                                                                                                                               | C15H10O7             | M-H    | 301.035           | 301.031 | 324.485                   | Flavonoids | 0.967868 | 213                                 | 328                                     | REFJWTPEDVJJIY-<br>UHFFFAOYSA-N |
|         |                                                                                                                                                                                                                         |                      | 2M-H   | 603.078           | 603.072 | 327.858                   |            | 0.952956 |                                     |                                         |                                 |
|         |                                                                                                                                                                                                                         |                      | M+H    | 303.05            | 303.051 | 240.403                   |            | 0.922939 |                                     |                                         |                                 |
| 4       | Sophoraflavanone B                                                                                                                                                                                                      | C20H20O5             | M-H    | 339.124           | 339.119 | 456.999                   | Flavonoids | 0.958042 | 10                                  | 5                                       | LPEPZZAVFJPLNZ-<br>UHFFFAOYSA-N |
| 5       | Quercetin 3-O-malonylglucoside                                                                                                                                                                                          | C24H22O15            | M-H    | 549.089           | 549.084 | 256.759                   | Flavonoids | 0.955749 | 0                                   | 11                                      | NBQPHANHNTWD<br>ML-UJKBSQBPSA-N |
|         |                                                                                                                                                                                                                         |                      | M+H    | 551.103           | 551.105 | 256.966                   |            | 0.937842 |                                     |                                         |                                 |
| 6       | (+)-Epigallocatechin                                                                                                                                                                                                    | C15H14O7             | M-H    | 305.067           | 305.063 | 139.791                   | Flavonoids | 0.947082 | 0                                   |                                         | XMOCLSLCDHWD<br>HP-WFASDCNBSA-N |

|    |                                                                                                                                           |            |     |         |         |         |                          |          |    |    |                                 |
|----|-------------------------------------------------------------------------------------------------------------------------------------------|------------|-----|---------|---------|---------|--------------------------|----------|----|----|---------------------------------|
| 7  | Tiliroside                                                                                                                                | C30H26O13  | M-H | 593.13  | 593.124 | 313.544 | Flavonoids               | 0.942753 | 4  | 6  | DVGGLGXQSFURL<br>P-VWMSDXGPSA-N |
| 8  | N-Acetyl-DL-tryptophan                                                                                                                    | C13H14N2O3 | M-H | 245.093 | 245.09  | 257.818 | Tryptophan alkaloids     | 0.940713 | 1  |    | DZTHIGRZJZPRDV<br>-UHFFFAOYSA-N |
| 9  | Phloretin                                                                                                                                 | C15H14O5   | M-H | 273.077 | 273.074 | 281.908 | Flavonoids               | 0.940113 | 54 | 25 | VGEREEWJJVICBM-<br>UHFFFAOYSA-N |
| 10 | Isorhamnetin 3-galactoside                                                                                                                | C22H22O12  | M-H | 477.104 | 477.099 | 268.077 | Flavonoids               | 0.931247 | 0  | 12 | CQLRUIIRRYHHS<br>-UHFFFAOYSA-N  |
| 11 | Myricetin 3-galactoside                                                                                                                   | C21H20O13  | M-H | 479.083 | 479.078 | 219.71  | Flavonoids               | 0.927972 | 0  |    | FOHXFLPXBUAOJ<br>M-MGMURXEASA-N |
| 12 | 5,7-Dihydroxy-2-(4-hydroxy-3-methoxyphenyl)-3-[[3,4,5-trihydroxy-6-(3,4,5-trihydroxy-6-methyloxan-2-yl)oxyoxan-2-yl]methoxy]chromen-4-one | C28H32O16  | M-H | 623.162 | 623.156 | 258.192 | Flavonoids               | 0.925616 | 0  | 5  | LVAKTTFHRFASRZ<br>-UHFFFAOYSA-N |
| 13 | CHEBI:181292                                                                                                                              | C22H28O3   | M-H | 339.197 | 339.196 | 626.607 | Steroids                 | 0.923846 | 0  | 4  | UJVLDDZCTMKXJ<br>K-AFDHUMPMSA-N |
| 14 | Decylbenzene sulfonate                                                                                                                    | C16H26O3S  | M-H | 297.141 | 297.149 | 514.903 | Aromatic polyketides     | 0.915461 | 0  |    | UAZLASMTBCLJK<br>O-UHFFFAOYSA-N |
| 15 | Phlorizine                                                                                                                                | C21H24O10  | M-H | 435.13  | 435.125 | 260.992 | Flavonoids               | 0.902518 | 0  | 4  | IOUVKUPGCMBW<br>BT-UHFFFAOYSA-N |
| 16 | Licoflavanone                                                                                                                             | C20H20O5   | M-H | 339.123 | 339.12  | 481.887 | Isoflavonoids Flavonoids | 0.902477 | 0  | 5  | CGKWSLSAYABZT<br>L-UHFFFAOYSA-N |
|    |                                                                                                                                           |            | M+H | 341.138 | 341.14  | 481.701 |                          | 0.767127 |    |    |                                 |
| 17 | L-Epicatechin                                                                                                                             | C15H14O6   | M-H | 289.072 | 289.068 | 194.004 | Flavonoids               | 0.900784 | 26 | 10 | PFTAWBLQPZVEM<br>U-UHFFFAOYSA-N |

|    |                                                                    |                                                 |     |         |         |         |                                                    |          |    |     |                                  |
|----|--------------------------------------------------------------------|-------------------------------------------------|-----|---------|---------|---------|----------------------------------------------------|----------|----|-----|----------------------------------|
| 18 | Trehalose                                                          | C <sub>12</sub> H <sub>22</sub> O <sub>11</sub> | M-H | 341.109 | 341.105 | 38.082  | Saccharides                                        | 0.895209 | 43 | 95  | HDTRYLNUVZCQ<br>OY-LIZSDCNHSA-N  |
| 19 | Quercitrin                                                         | C <sub>21</sub> H <sub>20</sub> O <sub>11</sub> | M-H | 447.093 | 447.088 | 260.205 | Flavonoids                                         | 0.879555 | 14 | 35  | OXGUCUVFOIWW<br>QJ-HQBVPOQASA-N  |
| 20 | 4-Caffeoylquinic acid                                              | C <sub>16</sub> H <sub>18</sub> O <sub>9</sub>  | M-H | 353.088 | 353.084 | 155.412 | Phenylpropanoids (C <sub>6</sub> -C <sub>3</sub> ) | 0.877415 | 3  | 2   | GYFFKZTYAFCTR<br>-JUHZACGLSA-N   |
| 21 | Avicularin                                                         | C <sub>20</sub> H <sub>18</sub> O <sub>11</sub> | M-H | 433.078 | 433.074 | 257.208 | Flavonoids                                         | 0.867424 | 0  | 10  | BDCDNTVZSILEOY<br>-UXYNSRGZSA-N  |
| 22 | Afzelin                                                            | C <sub>21</sub> H <sub>20</sub> O <sub>10</sub> | M-H | 431.098 | 431.094 | 286.49  | Flavonoids                                         | 0.864259 | 7  | 29  | SOSLMHZOJATCC<br>P-AEIZVZFYSA-N  |
| 23 | Isoastilbin                                                        | C <sub>21</sub> H <sub>22</sub> O <sub>11</sub> | M-H | 449.109 | 449.104 | 256.493 | Flavonoids                                         | 0.858162 | 0  |     | ZROGCCBNZBKLE<br>L-UHFFFAOYSA-N  |
| 24 | Kaempferol                                                         | C <sub>15</sub> H <sub>10</sub> O <sub>6</sub>  | M-H | 285.04  | 285.037 | 365.345 | Flavonoids                                         | 0.836085 | 55 | 158 | IYRMWMYZSQPJK<br>C-UHFFFAOYSA-N  |
|    |                                                                    |                                                 | M+H | 287.055 | 287.056 | 254.567 |                                                    | 0.943702 |    |     |                                  |
| 25 | 3-Glu-7-Rha Quercetin                                              | C <sub>27</sub> H <sub>30</sub> O <sub>16</sub> | M-H | 609.116 | 609.118 | 297.618 | Flavonoids                                         | 0.822161 | 1  | 6   | OTUCXMIQUNROB<br>J-DWZPKPSVSA-N  |
| 26 | 3-p-Coumaroylquinic acid                                           | C <sub>16</sub> H <sub>18</sub> O <sub>8</sub>  | M-H | 337.093 | 337.089 | 185.305 | Phenylpropanoids (C <sub>6</sub> -C <sub>3</sub> ) | 0.807546 | 0  | 2   | BMRSEYFENKXDIS<br>-QHAYPTCMSA-N  |
| 27 | 16-Hydroxy-9-oxooctadeca-10,12,14-trienoic acid                    | C <sub>18</sub> H <sub>28</sub> O <sub>4</sub>  | M-H | 307.19  | 307.187 | 420.602 | Fatty Acids and Conjugates                         | 0.792897 | 0  |     | KLFMLBSZQZVKD<br>C-UHFFFAOYSA-N  |
| 28 | MEGxp0_001915                                                      | C <sub>17</sub> H <sub>14</sub> O <sub>7</sub>  | M-H | 329.067 | 329.063 | 386.669 | Flavonoids                                         | 0.761361 | 0  |     | LOVMOOUQHWMII<br>HZ-RZNTYIFUSA-N |
| 29 | 6,8-Di-C-glucopyranosylnaringenin                                  | C <sub>27</sub> H <sub>32</sub> O <sub>15</sub> | M-H | 595.167 | 595.161 | 197.949 | Flavonoids                                         | 0.755636 | 0  |     | KLDARLGFVGIIL-<br>UHFFFAOYSA-N   |
| 30 | 2,3,4-Trihydroxy-5-[3-(4-hydroxyphenyl)prop-2-enoyloxy]hexanedioic | C <sub>15</sub> H <sub>16</sub> O <sub>10</sub> | M-H | 355.066 | 355.063 | 141.387 | Phenylpropanoids (C <sub>6</sub> -C <sub>3</sub> ) | 0.744382 | 0  |     | LWEUFDJHDOPWF<br>E-UHFFFAOYSA-N  |

|    |                                 |            |            |         |         |         |                          |          |    |    |                                 |  |
|----|---------------------------------|------------|------------|---------|---------|---------|--------------------------|----------|----|----|---------------------------------|--|
|    | acid                            |            |            |         |         |         |                          |          |    |    |                                 |  |
| 31 | Xanthohumol                     | C21H22O5   | M-H        | 353.139 | 353.135 | 422.856 | Flavonoids               | 0.71692  | 13 | 19 | ORXQGKIUCDPEAJ<br>-YRNVUSSQSA-N |  |
| 32 | Dodecylbenzenesulfonic acid     | C18H30O3S  | M-H        | 325.173 | 325.18  | 587.275 | N/A                      | 0.706087 | 2  | 1  | WBIQQQGBSDOW<br>NP-UHFFFAOYSA-N |  |
| 33 | Procyanidin trimer T2           | C45H38O18  | M-H        | 865.199 | 865.19  | 190.685 | Flavonoids               | 0.703292 | 0  |    | MOJZMWJRUKIQG<br>L-UHFFFAOYSA-N |  |
| 34 | N/A                             | C49H56N4O8 | M+2H       | 415.212 | 415.213 | 490.208 | N/A                      | 0.98754  |    |    | OZMHKRBQDGOI<br>DU-UHFFFAOYSA-N |  |
| 35 | Tetradecyldiethanolamine        | C18H39NO2  | M+H        | 302.305 | 302.307 | 573.779 | Fatty acyls Fatty amides | 0.979801 |    |    | CPHJEACXPATRSU<br>-UHFFFAOYSA-N |  |
| 36 | Abrine                          | C12H14N2O2 | M+H-CH3NH2 | 188.074 | 188.071 | 163.517 | N/A                      | 0.977637 |    | 4  | CZCIKBSVHDNID<br>H-NSHDSACASA-N |  |
| 37 | Nonaethylene glycol             | C18H38O10  | M+H        | 415.254 | 415.255 | 221.113 | Glycerolipids            | 0.976824 | 44 | 76 | YZUUTMGDONTG<br>TN-UHFFFAOYSA-N |  |
| 38 | Kaempferol-7-O-neohesperidoside | C27H30O15  | M+H        | 595.166 | 595.168 | 254.211 | Flavonoids               | 0.964195 |    | 1  | ZEJXENDZTYVXDP<br>-UHFFFAOYSA-N |  |
| 39 | Kaempferin                      | C21H20O10  | M+H        | 433.113 | 433.115 | 287.412 | Flavonoids               | 0.964082 |    | 10 | SOSLMHZOJATCC<br>P-UHFFFAOYSA-N |  |
| 40 | Undecaethylene Glycol           | C22H46O12  | M+H        | 503.306 | 503.308 | 237.063 | Glycerolipids            | 0.960846 |    |    | PSVXZQVXSXSQRO<br>-UHFFFAOYSA-N |  |
| 41 | N-Lauryldiethanolamine          | C16H35NO2  | M+H        | 274.274 | 274.275 | 469.958 | Fatty acyls Fatty amides | 0.959429 |    | 1  | NKFNBVMJTSYZD<br>V-UHFFFAOYSA-N |  |
| 42 | Spiraeoside                     | C21H20O12  | M+H        | 465.103 | 465.104 | 240.562 | Flavonoids               | 0.959397 |    |    | OIUBYZLTFSLSBY-<br>UHFFFAOYSA-N |  |
| 43 | 8-Prenylnaringenin              | C20H20O5   | M+H        | 341.138 | 341.14  | 457.118 | Flavonoids               | 0.957149 | 13 | 9  | LPEPZZAVFJPLNZ-<br>SFHVURJKSA-N |  |
| 44 | Vitamin P                       | C27H30O16  | M+H        | 611.161 | 611.161 | 240.015 | Flavonoids               | 0.955041 |    | 12 | IKGXIBQEEMLURG<br>-UHFFFAOYSA-N |  |

|    |                                           |                                                   |                      |         |         |         |              |          |    |     |                                 |
|----|-------------------------------------------|---------------------------------------------------|----------------------|---------|---------|---------|--------------|----------|----|-----|---------------------------------|
| 45 | Procyanidin B2                            | C <sub>30</sub> H <sub>26</sub> O <sub>12</sub>   | M+H                  | 579.15  | 579.152 | 171.631 | N/A          | 0.94619  | 11 | 7   | XFZJEEAOWLFHD<br>H-NFJBMHMQSA-N |
| 46 | Myricetin                                 | C <sub>15</sub> H <sub>10</sub> O <sub>8</sub>    | M+H                  | 319.045 | 319.046 | 224.47  | Flavonoids   | 0.943855 | 10 | 131 | IKMDFBPHZJCSN<br>-UHFFFAOYSA-N  |
| 47 | Compound NP-000390                        | C <sub>28</sub> H <sub>32</sub> O <sub>16</sub>   | M+H                  | 625.176 | 625.179 | 258.55  | Flavonoids   | 0.939295 |    | 8   | UIDGLYUNOUKLB<br>M-ACHADDEXSA-N |
| 48 | 1-Palmitoylphosphatidylcholine            | C <sub>24</sub> H <sub>50</sub> NO <sub>7</sub> P | M+H                  | 496.339 | 496.342 | 585.515 | N/A          | 0.915245 | 4  | 14  | ASWBNKHCZGQVJ<br>V-HSZRJFAPSA-N |
| 49 | Acetyl tributyl citrate                   | C <sub>20</sub> H <sub>34</sub> O <sub>8</sub>    | M+H                  | 403.233 | 403.236 | 656.655 | Fatty esters | 0.908293 |    | 2   | QZCLKYGREBVAR<br>F-UHFFFAOYSA-N |
| 50 | CHEBI:143757                              | C <sub>22</sub> H <sub>30</sub> O <sub>6</sub>    | M+ACN+H              | 432.238 | 432.24  | 489.593 | Diterpenoids | 0.876296 |    |     | WZYGIALDVOKLL<br>L-UHFFFAOYSA-N |
| 51 | Acanthoside B                             | C <sub>28</sub> H <sub>36</sub> O <sub>13</sub>   | M+NH <sub>4</sub>    | 598.25  | 598.253 | 265.01  | Lignans      | 0.868324 | 1  |     | WEKCEGQSIIQPA<br>Q-IRBNZIFYSA-N |
| 52 | Isofraxidin                               | C <sub>11</sub> H <sub>10</sub> O <sub>5</sub>    | M+H                  | 223.06  | 223.062 | 206.995 | Coumarins    | 0.868268 |    | 6   | HOEVRHHMDJKU<br>MZ-UHFFFAOYSA-N |
| 53 | LPC(18:3/0:0)                             | C <sub>26</sub> H <sub>48</sub> NO <sub>7</sub> P | M+H                  | 518.325 | 518.328 | 501.054 | N/A          | 0.86329  |    |     | WKQNRCYKYCKE<br>SD-YVHLTTHBSA-N |
| 54 | N-Oleylethanolamine                       | C <sub>20</sub> H <sub>39</sub> NO <sub>2</sub>   | M+H                  | 326.305 | 326.307 | 701.164 | Fatty amides | 0.862799 | 10 | 19  | BOWVQLFMWHZB<br>EF-KTKRTIGZSA-N |
| 55 | Compound NP-012184                        | C <sub>33</sub> H <sub>40</sub> O <sub>21</sub>   | M+H                  | 773.213 | 773.216 | 189.1   | Flavonoids   | 0.85147  |    |     | KVODFZNXODDE<br>CO-LSSGXCBSA-N  |
| 56 | Beta-gentiobiose octaacetate              | C <sub>28</sub> H <sub>38</sub> O <sub>19</sub>   | M+H-H <sub>2</sub> O | 325.107 | 325.115 | 74.224  | N/A          | 0.838769 |    |     | GNTLGGDVHFXGL<br>I-QACPWNKNSA-N |
| 57 | 3,5-Di-tert-butyl-4-hydroxybenzyl alcohol | C <sub>15</sub> H <sub>24</sub> O <sub>2</sub>    | M+H-H <sub>2</sub> O | 219.175 | 219.176 | 291.499 | N/A          | 0.838441 | 1  | 1   | HNURKXXMYARG<br>AY-UHFFFAOYSA-N |

|    |                                                      |                |             |         |         |         |                             |          |    |    |                                     |
|----|------------------------------------------------------|----------------|-------------|---------|---------|---------|-----------------------------|----------|----|----|-------------------------------------|
| 58 | Scopoletin                                           | C10H8O4        | M+H         | 193.05  | 193.051 | 197.377 | Coumarins                   | 0.837691 | 3  | 16 | RODXRVNMMDRFI<br>K-UHFFFAOYSA-N     |
| 59 | Isorhamnetin                                         | C16H12O7       | M+H         | 317.066 | 317.067 | 259.771 | Flavonoids                  | 0.836521 | 10 | 86 | IZQSVBPOUDKVD<br>Z-UHFFFAOYSA-N     |
| 60 | 4-O-Glucopyranosyl<br>cinnamate                      | C15H18O8       | M+NH4       | 344.134 | 344.135 | 43.184  | Phenylpropanoids<br>(C6-C3) | 0.834431 | 2  |    | LJFYQZQUAULRD<br>F-XMFQKSOQSA-N     |
| 61 | Flavone Base + 4O, O-<br>MalonylHex                  | C24H22O1<br>4  | M+H         | 535.109 | 535.11  | 275.896 | Flavonoids                  | 0.831401 |    | 2  | RNDGJCZQVKFBPI<br>-UHFFFAOYSA-N     |
| 62 | Pheophorbide A                                       | C35H36N4<br>O5 | M+H         | 593.269 | 593.277 | 733.199 | Tryptophan<br>alkaloids     | 0.827008 |    |    | OINDWIFDMFYGD<br>X-UHFFFAOYSA-N     |
| 63 | Tryptophan N-glucoside                               | C17H22N2<br>O7 | M+H         | 367.15  | 367.152 | 154.018 | N/A                         | 0.824658 |    |    | ZHBHZZDMTVVJAS<br>V-JOSVURMMSA-N    |
| 64 | Syringic acid                                        | C9H10O5        | M+H         | 199.06  | 199.062 | 150.957 | Phenolic acids (C6-<br>C1)  | 0.822475 | 2  | 12 | JMSVCTWVEWCH<br>DZ-UHFFFAOYSA-<br>N |
| 65 | Sinapic acid                                         | C11H12O5       | M+H-<br>H2O | 207.065 | 207.066 | 195.241 | Phenylpropanoids<br>(C6-C3) | 0.818996 |    | 8  | PCMORTLOPMLEF<br>B-UHFFFAOYSA-N     |
| 66 | 13S-Hydroxy-9Z,11E,15Z-<br>octadecatrienoic acid     | C18H30O3       | M+H-<br>H2O | 277.216 | 277.217 | 517.327 | N/A                         | 0.815788 |    | 2  | KLLGGGQNRTVBS<br>U-FQSPHKRJSAN      |
| 67 | Dihydroactinolide                                    | C11H16O2       | M+H         | 181.12  | 181.123 | 418.062 | N/A                         | 0.813538 |    |    | IMKHDCBNRDRUE<br>B-UHFFFAOYSA-N     |
| 68 | Compound NP-002265                                   | C27H30O1<br>7  | M+H         | 627.155 | 627.158 | 189.047 | Flavonoids                  | 0.805538 |    | 9  | UTECWQIXBMWR<br>RR-UHFFFAOYSA-<br>N |
| 69 | D-1-[(3-<br>Carboxypropyl)amino]-1-<br>deoxyfructose | C10H19NO<br>7  | M+H         | 266.12  | 266.125 | 38.803  | N/A                         | 0.80273  |    |    | HUEOABWGBTXQ<br>NF-SFKDOBOXSA-<br>N |
| 70 | Flavonol base + 6O, O-<br>MalonylHex                 | C24H22O1<br>6  | M+H         | 567.1   | 567.102 | 237.223 | Flavonoids                  | 0.791564 |    | 9  | HPUSNSBFKNJRQ<br>A-UHFFFAOYSA-N     |
| 71 | Pyropheophorbide A                                   | C33H34N4<br>O3 | M+H         | 535.27  | 535.273 | 771.657 | Tryptophan<br>alkaloids     | 0.772783 |    | 1  | IEGUQQKIFBYXLG-<br>UWJYYQICSA-N     |
| 72 | 1-Palmitoyl-Sn-Glycerol                              | C19H38O4       | M+H         | 331.284 | 331.287 | 716.683 | N/A                         | 0.771971 |    | 1  | QHZLMUACJMDIA<br>E-SFHVURJKSA-N     |

|    |                                      |            |     |         |         |         |                      |          |   |   |                                     |
|----|--------------------------------------|------------|-----|---------|---------|---------|----------------------|----------|---|---|-------------------------------------|
| 73 | Pheophorbide a                       | C35H36N4O5 | M+H | 593.274 | 593.279 | 731.085 | Tryptophan alkaloids | 0.771941 |   |   | NSFSLUUZQIAOO<br>X-LDCXZXNSSA-N     |
| 74 | Glyceryl monooleate                  | C21H40O4   | M+H | 357.3   | 357.302 | 726.602 | Glycerolipids        | 0.76615  | 2 | 6 | RZRNAYUHWVFM<br>IP-UHFFFAOYSA-N     |
| 75 | (+)-Magnoflorine Iodide              | C20H24NO4+ | M+  | 342.17  | 342.172 | 227.603 | N/A                  | 0.759681 |   | 5 | YLRXAIKMLINXQY<br>-UHFFFAOYSA-O     |
| 76 | MEGxp0_001151                        | C30H36O9   | M+H | 541.243 | 541.245 | 536.342 | Triterpenoids        | 0.758419 |   |   | NHOIBRJOQAYBJT-<br>WILUFPLZSA-N     |
| 77 | 10-Hydroxyphaeophorbide              | C35H36N4O6 | M+H | 609.272 | 609.272 | 704.304 | Tryptophan alkaloids | 0.750716 |   |   | TXOKSKCKTYISQV<br>-FHCXDJKBSA-N     |
| 78 | N-(1-Deoxy-1-fructosyl)phenylalanine | C15H21NO7  | M+H | 328.14  | 328.141 | 117.629 | N/A                  | 0.739045 |   |   | FAVRCIXPIVJIPN-<br>VJDSNFAGSA-N     |
| 79 | Bolusanthol C                        | C25H28O5   | M+H | 409.201 | 409.203 | 561.03  | Isoflavonoids        | 0.730126 |   | 1 | CEBSROOTTDEPK<br>N-UHFFFAOYSA-N     |
| 80 | Erucamide                            | C22H43NO   | M+H | 338.341 | 338.344 | 823.353 | N/A                  | 0.722795 | 2 | 1 | UAUDZVJPLUQN<br>MU-KTKRTIGZSA-<br>N |
